17 **ABSTRACT**

18 *Cucurbita moschata* D. seed oil contains approximately 75% unsaturated fatty acids, with high  
19 levels of monounsaturated fatty acids and antioxidant compounds such as vitamin E and  
20 carotenoid, constituting a promising food in nutritional terms. Associated to this, the Brazilian  
21 germplasm of *C. moschata* exhibits remarkable variability, representing an important source  
22 for the genetic breeding of this vegetable and other cucurbits. In this context, the present study  
23 evaluated the productivity and profile of the seed oil of 91 *C. moschata* accessions from  
24 different regions of Brazil and maintained in the Vegetable Germplasm Bank of the Federal  
25 University of Viçosa (BGH-UFV). A field experiment was conducted between January and  
26 July 2016. The tested *C. moschata* accessions showed high genetic variability in terms of  
27 characteristics related to seed oil productivity (SOP), such as the mass of seeds per fruit and  
28 productivity of seeds, providing predicted selection gains of 29.39 g and 0.26 t ha<sup>-1</sup>,  
29 respectively. Based on the phenotypic and genotypic correlations, greater SOP can be achieved  
30 while maintaining high oleic acid content and low linoleic acid content, providing oil of better  
31 nutritional and chemical quality. In variability analysis, the accessions were clustered into five  
32 groups, which presented different averages for SOP and fatty acid content of seed oil; approach  
33 that will guide the use of appropriate germplasm in programs aimed at genetic breeding for  
34 SOP and seed oil profile. *Per se* analysis identified BGH-4610, BGH-5485A, BGH-6590,  
35 BGH-5556A, BGH-5472A, and BGH-5544A as the most promising accessions in terms of  
36 SOP, with average ( $\mu+g$ ) of approximately 0.20 t ha<sup>-1</sup>. The most promising accessions for  
37 higher oleic acid content of seed oil were BGH-5456A, BGH-3333A, BGH-5361A, BGH-  
38 5472A, BGH-5544A, BGH-5453A, and BGH-1749, with average ( $\mu+g$ ) of approximately  
39 30%, and almost all of these accessions were also the most promising in terms of lower linoleic  
40 acid content of seed oil, with average ( $\mu+g$ ) of approximately 45%. Overall, part of the *C.*  
41 *moschata* accessions evaluated in the present study can serve as a promising resource in genetic

42 breeding programs for SOP and fatty acid profile, aiming at the production of oil with better  
43 nutritional and physicochemical quality.

44 **KEYWORDS:** bioactive compounds, genetic correlation, clustering, *Cucurbita moschata*,  
45 genetic parameters, seed oil

46

## 47 **1. INTRODUCTION**

48 Winter squash (*Cucurbita moschata* D.) is one of the cucurbit vegetables of great  
49 socioeconomic importance owing to the high nutritional value of its fruits and seeds. Cultivated  
50 mainly for fruit production, *C. moschata* has been strategically used in biofortification  
51 programs for vitamin A because of its high content of carotenoids in fruits such as  $\beta$ - and  $\alpha$ -  
52 carotene—the major precursors of vitamin A (Carvalho et al., 2012; Saltzman et al., 2013). In  
53 addition, winter squash fruits are an excellent source of minerals such as K, Ca, P, Mg, and Cu  
54 (Nagar et al., 2018; Priori et al., 2018). *C. moschata* is cultivated across a wide geographical  
55 range worldwide, and together with other cucurbits such as *C. pepo* and *C. maxima*, the area  
56 under the cultivation and worldwide production of *C. moschata* was estimated to be nearly 2  
57 million hectares and 27.6 million tons, respectively, in 2018 (FAO, 2020), highlighting the  
58 socioeconomic importance of this vegetable.

59 Furthermore, *C. moschata* seed oil can serve as an excellent product due to its  
60 nutritional and physicochemical properties, associated with the high seed production potential  
61 of this vegetable. Lipids account for up to 49% of *C. moschata* seed components (Jarret et al.,  
62 2013; Patel, 2013), and studies on the germplasm of this cucurbit have already identified  
63 accessions that can produce up to 0.58 t·ha<sup>-1</sup> of seeds (Gomes et al., 2020). *C. moschata* seed  
64 oil contains approximately 75% unsaturated fatty acids, with high content of monounsaturated  
65 fatty acids (MUFAs), such as oleic acid (Jarret et al., 2013; Sobreira, 2013; Veronezi and Jorge  
66 2015). Thus, it is an excellent substitute for vegetable lipid sources that contain high levels of

67 saturated fatty acids, which are harmful to human health. Associated with this, some studies  
68 have reported that *C. moschata* seeds and seed oil contain high levels of antioxidant  
69 compounds, such as vitamin E and carotenoids, components beneficial to human health  
70 (Veronezi and Jorge 2012; Dash et al., 2017), which also protect the seed oil from oxidative  
71 processes that may lead to rancidity. In this line, *C. moschata* seed oil may serve as a health  
72 food in the cultivation regions of this vegetable, particularly in less developed regions, and in  
73 the family farming context (Gomes et al., 2020).

74         Studies on the Brazilian germplasm of *C. moschata* have emphasized the evaluation of  
75 agromorphological characteristics reporting remarkable variability in these traits (De Lima et  
76 al., 2016; Ferreira et al., 2016; Oliveira et al., 2016; Gomes et al., 2020). As an allogamous  
77 species, variability in the *C. moschata* germplasm is associated with the occurrence of natural  
78 hybridization across different populations. Already present in the diet of native Latin American  
79 people (Dillehay et al., 2007; Piperno et al., 2003), and with a widespread cultivation in the  
80 American continent, the variability of *C. moschata* may also be related to anthropogenic  
81 actions, such as frequent exchange of seeds among family farmers (Gomes et al., 2020).  
82 Additionally, the variability of the Brazilian germplasm of *C. moschata* reflects its adaptation  
83 to a broad ecological range, constituting different edaphoclimatic conditions; thus, these  
84 accessions represent an important source for the genetic breeding of this vegetable and other  
85 cucurbits.

86         The Vegetable Germplasm Bank of the Federal University of Viçosa (BGH-UFV)  
87 maintains approximately 350 accessions of *C. moschata*, mostly landraces, with a collection  
88 period of over five decades, from different geographic regions of Brazil (Silva et al., 2001).  
89 The *C. moschata* collection maintained in the BGH-UFV constitutes a substantial sample of  
90 the Brazilian germplasm, being one of the largest collections of this species in the country  
91 (Fonseca et al., 2015). A preliminary assessment of the seed oil fatty acid profile of a small

92 part of the *C. moschata* germplasm maintained in the BGH-UFV revealed high variability  
93 among 54 accessions in terms of oleic acid content (Sobreira, 2013). In that study, BGH-7765,  
94 with oil oleic acid content of 28.39%, was identified as a promising accession for use as parent  
95 germplasm in breeding programs aimed at improving *C. moschata* seed oil.

96 To this end, the objectives of the present study were (a) to evaluate the seed oil  
97 productivity (SOP) and oil fatty acid profiles of 91 *C. moschata* accessions from different  
98 regions of Brazil maintained in the BGH-UFV; (b) to analyze the correlations between these  
99 characteristics; and (c) to examine the variability of this germplasm for identifying accessions  
100 with high SOP and high oleic fatty acid content but low linoleic acid content in seed oil.

## 101 2. MATERIAL AND METHODS

### 102 2.1 Germplasm origin

103 The present study evaluated 91 *C. moschata* accessions maintained in the BGH-UFV.  
104 These accessions, mostly landraces, have been collected by the BGH-UFV over a period of  
105 more than five decades (Silva et al., 2001) from different geographical regions of Brazil (Figure  
106 1). The accessions were evaluated with four genotypes used as controls, the cultivars  
107 ‘Jacarezinho’ and ‘Maranhão’ and the hybrids Jabras and Tetsukabuto, which are widely  
108 cultivated and commercialized in Brazil.

109

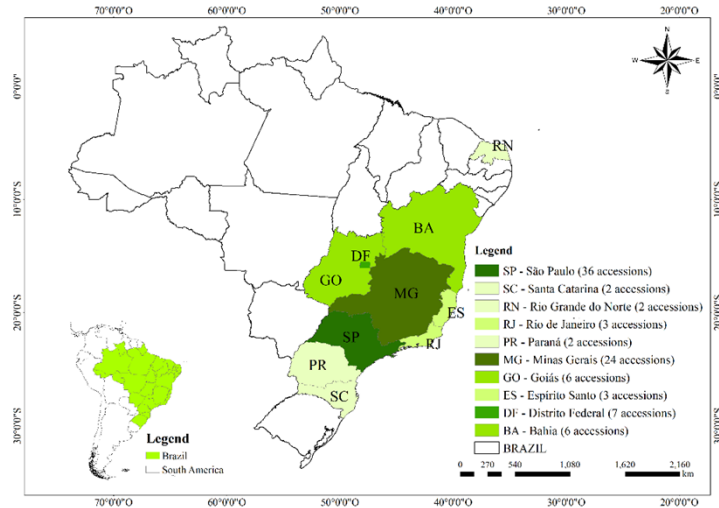

110

111 **Figure 1.** Brazilian map displaying the regions of origin of the *Cucurbita moschata* accessions  
112 tested in the present study.

## 113 2.2 Location and conduct of the experiment

114 A field experiment was conducted between January and July 2016 at “Horta Velha”—  
115 an experimental unit of the Department of Agronomy of UFV (20°45'24"S, 42°50'45"W;  
116 altitude, 648.74 m).

117 The genotype seedlings were cultivated in expanded polystyrene trays with 72 cells  
118 containing a commercial substrate. Subsequently, the seedlings were transplanted in the  
119 experimental area following to the augmented block design proposed by Federer (1956), with  
120 five replicates for each control. The plants were distributed with 3 × 3 m spacing between  
121 plants and rows, resulting in a stand of 1,111 plants ha<sup>-1</sup>. Each experimental plot contained  
122 five plants, and all evaluations of fruits, seeds, and seed oil were performed on three fruits  
123 each from three central plants in a plot.

## 124 2.3 Assessment of seed oil productivity

125 The genotypes were evaluated for the number of fruits per plant (NFP), total mass of seeds per  
126 fruit (MSF), productivity of seeds (PS), and total seed oil content (SOC). The PS, SOC, and

127 SOP estimates were obtained using the following equations (equations 1, 2, and 3,  
128 respectively):

$$129 \quad PS = NFP \times MSF \times 1,111^* \quad (1)$$

$$130 \quad SOC = \frac{\text{Weight of oil extracted from the seed sample (mg)}}{\text{Total weight of the seed sample (mg)}} \times 100 \quad (2)$$

$$131 \quad SOP = \frac{PS \times SOC}{100} \quad (3)$$

132 where PS is the productivity of seeds (t ha<sup>-1</sup>); NFP is the number of fruits per plant; MSF is the  
133 mass of seeds per fruit (g); \*1,111 is the number of plants per hectare; SOC is the oil content  
134 expressed as the percentage of the seed mass on a dry basis (%); and SOP is the seed oil  
135 productivity (t ha<sup>-1</sup>).

136 Initially, the seeds were dried in a forced air circulation oven for 72 h at 30°C. Next, 20  
137 g seeds from each genotype were ground in a Willey knife mill with a 1 mm sieve. SOC was  
138 determined in an extractor (ANKOM XT15) following extraction with petroleum ether using  
139 a standard AOAC method (Thiex et al., 2003). Before loading in the extractor, the ground seed  
140 samples were dried in an unventilated oven at 105°C for 2 h. Then, approximately 2 g samples  
141 were transferred to filter envelopes (XT4; ANKOM technology), which were sealed and placed  
142 in the extractor. Oil was extracted from the samples with ether circulation for 30 min at 90°C,  
143 and the percentage of oil was calculated as the difference between the sample weight before  
144 and after extraction. SOC was expressed in grams per 100 grams of seeds on a dry basis.

#### 145 **2.4 Analysis of the fatty acid profile of seed oil**

146 Seed oil extracted by cold pressing was subjected to gas chromatography. Oil was  
147 extracted from approximately 50 g of seeds using a hydraulic press aid according to the  
148 methodology described by Gomes et al. (2020).

149 The composition of the methyl esters of oil fatty acids was determined according to the  
150 methodology described by Bubeck et al. (1989), with some modifications. The Shimadzu GC-

151 17A gas chromatograph equipped with an automatic insertion platform, a flame ionization  
152 detector, and a Carbowax capillary column (30 m × 0.25 mm) was used. Chromatography was  
153 performed at an injector temperature of 230°C and detector temperature of 250°C. The column  
154 operation was programmed to start at 200°C, with an increase of 3°C·min<sup>-1</sup> until reaching the  
155 final temperature of 225°C. Nitrogen was used as the carrier gas at a flow rate of 1.3 L·min<sup>-1</sup>.  
156 The content of each methyl ester of fatty acids was expressed as a percentage of relative peak  
157 area.

## 158 **2.5 Obtaining of best non-biased linear predictions (BLUPs), best non-biased linear** 159 **estimates (BLUEs), variance components, and genetic-statistical parameters**

160 Data were analyzed using a mixed model based on the predictions of restricted  
161 maximum likelihood (RML) and BLUPs. The “lme4” package in R version 3.6.1 was used  
162 (Bates et al., 2015). The variance components were obtained based on RML, and the genotypic  
163 values were obtained based on BLUPs and BLUEs using the following model:

$$164 \quad y = Wb + Xa + Zt + e$$

165 where  $y$  represents the vector comprising the phenotypic values of variables;  $b$   
166 represents the vector comprising the effect of blocks (random effect);  $a$  represents the vector  
167 comprising the effect of accessions (random effect);  $t$  represents the vector comprising the  
168 control effect (fixed effect); and  $e$  represents the error vector.  $W$ ,  $X$ , and  $Z$  represent the  
169 incidence matrices of parameters  $b$ ,  $a$ , and  $t$ , respectively, with the data vector  $y$ . All statistical  
170 analyses were performed based on the genotypic values.

171 The genetic parameters were obtained based on the following estimators:

$$172 \quad h^2 = 1 - (Pev / 2\sigma_g^2)$$

173 where  $Pev$  represents the prediction of error variance (Cullis et al., 2006)

$$174 \quad A = \sqrt{1 - (Pev / \sigma_g^2)}$$

$$175 \quad DS = h^{2*}$$



176 where  $DS$  represents the selection differential, estimated from an average of 15% of the most  
177 promising accessions for each characteristic.

$$178 \quad CV_g \% = (\sigma_g/\mu) \times 100$$

$$179 \quad CV_p \% = (\sigma_p/\mu) \times 100$$

$$180 \quad CVr \% = (\sigma/\mu) \times 100.$$

## 181 **2.6 Analysis of correlations between characteristics**

182 The correlations between characteristics were analyzed based on the following model:

$$183 \quad rg = Cov(x, y) / \sqrt{\sigma_g^2(x) \sigma_g^2(y)}$$

184 where  $Cov(x, y)$  represents the genetic covariance between two variables, X and Y, and  $\sigma_g^2(x)$   
185 and  $\sigma_g^2(y)$  represent the genetic variances corresponding to the variables X and Y,  
186 respectively.

187 The significance of correlations was analyzed in GENES (Cruz, 2013) using the Mantel  
188 test (Z statistic) at 1% and 5% probability.

## 189 **2.7 Analysis of the germplasm variability**

190 The matrix of distances between the genotypes was obtained based on the genotypic  
191 values of characteristics related to SOP and seed oil profile. The distances between genotypes  
192 were estimated as the average Euclidean distance with data standardization. Based on this,  
193 variability was assessed using Tocher's clustering in GENES (Cruz, 2013).

194 Principal component analysis was used to identify the contribution of the characteristics  
195 to genotype variability using GENES (Cruz, 2013).

## 196 **2.8 Identification of promising accessions**

197 Promising accession clusters were identified, and *per se* analysis of the most promising  
198 accessions for each characteristic was performed. *Per se* identification was performed based  
199 on the ranking of the respective genotypic values and the environmental interaction-free  
200 genotypic value ( $\mu+g$ ), considering 15% of the most promising accessions.

201

## 202 3. RESULTS

### 203 3.1 Variance components and genetic-statistical parameters of characteristics related to 204 SOP and fatty acid profiles

205 MSF was the characteristic associated with SOP with the highest genotypic variance  
206 (Table 1). Regarding oil fatty acid profile, oleic acid content exhibited the highest genotypic  
207 variance. Linoleic acid and polyunsaturated fatty acid (PUFA) content exhibited genotypic  
208 variances of 10.66% and 10.65%, respectively. All these variances were significant ( $p < 0.01$ ),  
209 as shown in Table 1.

210 Most of the tested characteristics showed very high heritability ( $>0.70$ ) (Table 1),  
211 according to the classification of Resende (1995). The heritability estimates for PS, SOP, oleic  
212 acid content, and linoleic acid content were 0.705, 0.667, 0.857 and 0.729, respectively.

213 The predicted selection gains for PS and SOP were 0.266 and 0.10 t ha<sup>-1</sup>, respectively  
214 (Table 1). Among the characteristics related to oil fatty acid profile, oleic acid content achieved  
215 the greatest selection gain (6.99%), followed by linoleic acid content (-5.12%) and PUFA  
216 content (-5.11%), which also achieved considerable selection gains (Table 1). The phenotypic  
217 amplitude was up to 0.90 t ha<sup>-1</sup> (phenotypic mean, 0.26 t ha<sup>-1</sup>) for PS and up to 0.36 t ha<sup>-1</sup>  
218 (phenotypic mean, 0.050 t ha<sup>-1</sup>) for SOP (Table 1). Oleic acid content ranged from 16.01 to  
219 40.18% (phenotypic mean, 24.55%), and linoleic acid content from 36.58 to 58.33%  
220 (phenotypic mean, 50.66%).

221 **Table 1.** Variance components and genetic-statistical parameters of characteristics related to seed oil productivity and fatty acid profiles

| <b>Fruit trait</b>                |            |                     |            |          |          |       |           |                         |        |          |          |          |
|-----------------------------------|------------|---------------------|------------|----------|----------|-------|-----------|-------------------------|--------|----------|----------|----------|
| <b>Trait</b>                      | $\sigma_p$ | $\sigma_g$          | $\sigma_b$ | $\sigma$ | <i>A</i> | $h^2$ | <i>SG</i> | <i>Phenotypic range</i> | $\mu$  | $CV_g$ % | $CV_p$ % | $CV_r$ % |
| NFP                               | 8.683      | 2.876 <sup>ns</sup> | 0.585      | 5.222    | 0.600    | 0.361 | 1.961     | 1- 15                   | 4.783  | 35.456   | 61.607   | 47.776   |
| <b>Seed traits</b>                |            |                     |            |          |          |       |           |                         |        |          |          |          |
| <b>Traits</b>                     | $\sigma_p$ | $\sigma_g$          | $\sigma_b$ | $\sigma$ | <i>A</i> | $h^2$ | <i>SG</i> | <i>Range</i>            | $\mu$  | $CV_g$ % | $CV_p$ % | $CV_r$ % |
| MSF                               | 491.465    | 427.158**           | 16.394     | 47.913   | 0.943    | 0.891 | 29.399    | 4.4- 119.3              | 51.929 | 39.800   | 42.691   | 13.329   |
| PS                                | 0.042      | 0.025 <sup>ns</sup> | 0.006      | 0.010    | 0.839    | 0.705 | 0.266     | 0.01- 0.9               | 0.269  | 58.778   | 76.185   | 37.174   |
| SOC                               | 11.840     | 1.988 <sup>ns</sup> | 0.000      | 9.851    | 0.425    | 0.181 | 0.797     | 25.57- 48.89            | 18.516 | 7.614    | 18.583   | 16.950   |
| SOP                               | 0.007      | 0.004 <sup>ns</sup> | 0.001      | 0.002    | 0.816    | 0.667 | 0.102     | 0.003- 0.36 (3)         | 0.050  | 126.49   | 167.332  | 89.442   |
| <b>Traits of seed oil profile</b> |            |                     |            |          |          |       |           |                         |        |          |          |          |
| <b>Traits</b>                     | $\sigma_p$ | $\sigma_g$          | $\sigma_b$ | $\sigma$ | <i>A</i> | $h^2$ | <i>SG</i> | <i>Phenotypic range</i> | $\mu$  | $CV_g$ % | $CV_p$ % | $CV_r$ % |
| Palmitic                          | 1.064      | 0.000 <sup>ns</sup> | 0.077      | 0.987    | 0.000    | 0.000 | 0.000     | 12.04- 18.14            | 15.16  | 0.000    | 6.804    | 6.553    |
| Stearic                           | 1.159      | 0.000 <sup>ns</sup> | 0.066      | 1.093    | 0.000    | 0.000 | 0.000     | 6.31- 12.3              | 9.60   | 0.000    | 11.214   | 10.890   |
| Oleic                             | 24.863     | 17.182**            | 5.268      | 2.412    | 0.925    | 0.857 | 6.999     | 16.01- 40.18            | 24.55  | 16.884   | 20.310   | 6.326    |
| Linoleic                          | 17.914     | 10.664**            | 3.629      | 3.620    | 0.853    | 0.729 | -5.121    | 36.58- 58.33 (2)        | 50.66  | 6.446    | 8.354    | 3.755    |
| Linolenic                         | 0.001      | 0.001 <sup>ns</sup> | 0.000      | 0.000    | 0.992    | 0.986 | -0.013    | 0.01- 0.33              | 0.18   | 17.568   | 17.568   | 0.000    |
| Oleic/linoleic                    | 0.023      | 0.016 <sup>ns</sup> | 0.004      | 0.001    | 0.937    | 0.879 | 0.232     | 0.27- 1.09              | 0.049  | 258.14   | 309.505  | 0.000    |
| saturated                         | 2.074      | 0.000 <sup>ns</sup> | 0.151      | 1.923    | 0.000    | 0.000 | 0.000     | 21.03- 28.14            | 24.76  | 0.000    | 5.816    | 5.600    |
| PUFA                              | 17.906     | 10.653**            | 3.617      | 3.634    | 0.853    | 0.728 | -5.116    | 36.60- 58.34 (2)        | 50.68  | 6.440    | 8.349    | 3.761    |

222 Number of fruits per plant (NFP), mass of seeds per fruit (MSF), productivity of seeds (PS), seed oil content (SOC), seed oil productivity (SOP), and  
 223 polyunsaturated fatty acid (PUFA) content. Components of phenotypic ( $\sigma_p$ ), genotypic ( $\sigma_g$ ), and residual ( $\sigma$ ) variances as well as variance associated with the  
 224 block effect ( $\sigma_b$ ). Accuracy (*A*), broad-sense heritability ( $h^2$ ), selection gain (*SG*), phenotypic range, phenotypic average ( $\mu$ ), coefficient of genotypic ( $CV_g$ , %),  
 225 phenotypic ( $CV_p$ , %), and residual ( $CV_r$ , %) variation. Not significant (ns); \*\* $p < 0.01$  and \* $p < 0.05$ , likelihood-ratio test.

## 226 3.2 Correlations of characteristics related to SOP and fatty acid profiles

227 For convenience, NFP, MSF, and PS were assumed to be directly related to SOP. The  
 228 phenotypic correlations of these first variables with SOP ranged from 0.51 (SOP × MSF) to  
 229 0.99 (SOP × PS), with all correlations being significant ( $p < 0.01$ ). The phenotypic correlations  
 230 between SOP × PS (0.99) and SOP × NFP (0.75) were classified as very strong and strong,  
 231 respectively, according to Shimakura and Ribeiro Júnior (2012). The genotypic correlations  
 232 between characteristics directly related to SOP were similar to the phenotypic correlations in  
 233 terms of direction and significance, although their magnitude was slightly smaller (Figure 2).

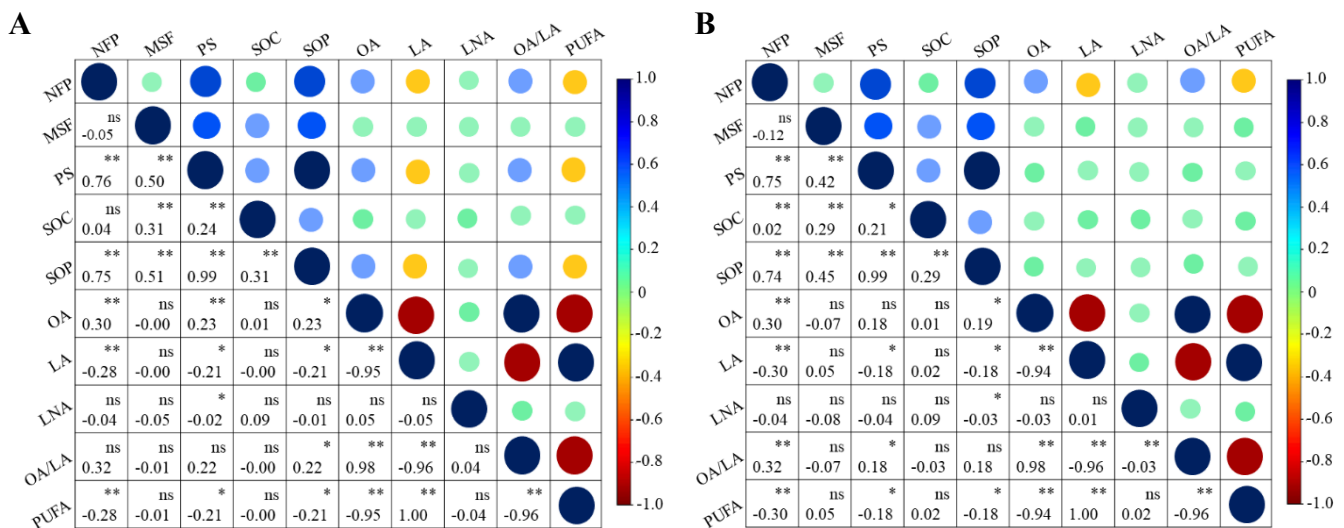

234 **Figure 2.** Phenotypic (A) and genotypic (B) correlations of characteristics related to seed oil  
 235 productivity and fatty acids. Number of fruits per plant (NFP), mass of seeds per fruit (MSF),  
 236 productivity of seeds (PS), seed oil content (SOC), seed oil productivity (SOP), oleic acid (OA)  
 237 content, linoleic acid (LA) content, linolenic acid (LNA) content, OA:LA ratio, and  
 238 polyunsaturated fatty acid (PUFA) content were measured.

239 SOP showed the strongest positive correlation with oleic acid content (0.23) and oleic  
 240 acid:linoleic ratio (0.22) and strongest negative correlations with linoleic (-0.21) and PUFA (-  
 241 0.21) content. SOP showed weak correlations with fatty acids, according to Shimakura and  
 242 Ribeiro Júnior (2012), ranging from 0.20 to 0.39. Most of the genotypic correlations between

243 SOP and oil fatty acids were similar to the phenotypic correlations in terms of direction and  
244 significance, although their magnitude was smaller (Figure 2).

245         Among fatty acids, linoleic and PUFA content showed the strongest positive correlation  
246 (1;  $p < 0.01$ ) (Figure 2). The correlation between the oleic content  $\times$  oleic acid:linoleic ratio  
247 (0.98;  $p < 0.01$ ) was classified as very strong (Figure 2), according to Shimakura and Ribeiro  
248 Júnior (2012). Oleic acid:linoleic ratio  $\times$  linoleic acid content and oleic acid:linoleic ratio  $\times$   
249 PUFA acid content showed very strong negative correlations (both -0.96;  $p < 0.01$ ). Similarly,  
250 oleic acid content  $\times$  linoleic acid content showed very strong negative correlation (-0.95;  $p$   
251  $< 0.01$ ). Most of the genotypic correlations between fatty acids were similar to the phenotypic  
252 correlations in terms of direction, significance, and magnitude (Figure 2).

### 253 **3.3 Clustering and variability of accessions based on characteristics related to SOP and** 254 **fatty acid profiles**

255         In clustering analysis, the tested accessions and controls formed five groups. Group 1  
256 included 83 accessions (91.20%) and the controls Jabras, Jacarezinho, Maranhão, and  
257 Tetsukabuto. Group 2 comprised eight accessions (8.79%), corresponding to the second largest  
258 group. Group 3 comprised two accessions, and the remaining groups (4 and 5) comprised a  
259 single accession each (Table 2).

260

261

262

263

264

265

266

267 **Table 2.** Tocher's clustering of accessions based on the genotypic values of characteristics  
 268 related to seed oil productivity and oil fatty acid profiles

| Clusters | Accessions                                                                                                                                                                                                                                                                                                                                                                                                                                                                                                                                                                                                                                                                                                                                                                                               |
|----------|----------------------------------------------------------------------------------------------------------------------------------------------------------------------------------------------------------------------------------------------------------------------------------------------------------------------------------------------------------------------------------------------------------------------------------------------------------------------------------------------------------------------------------------------------------------------------------------------------------------------------------------------------------------------------------------------------------------------------------------------------------------------------------------------------------|
| 1        | BGH-5224 BGH-5240 BGH-5560A BGH-5301 BGH-6099 BGH-315 BGH-5603 BGH-1004 BGH-5499A BGH-5548A BGH-95 BGH-5554A BGH-5593 BGH-5638 BGH-5494A BGH-5530A BGH-5551 BGH-5597 BGH-5606A BGH-5552 BGH-900 BGH-6115 BGH-4598A BGH-5596A BGH-4590A BGH-5247A BGH-6096 BGH-5616A BGH-5553 BGH-5493A BGH-7668 BGH-5451 BGH-5659A BGH-4607A BGH-1461A BGH-6594 BGH-6794 BGH-5559A Maranhão BGH-6749 BGH-4516 BGH-5497 BGH-1927 BGH-4681A BGH-5694 BGH-117 BGH-6587A BGH-6117A BGH-6595 BGH-291 BGH-5648 BGH-5455A BGH-6116 BGH-5528 BGH-5639 BGH-5248 BGH-4287A BGH-4454A BGH-5624A BGH-6593 BGH-5541 Tetsukabuto BGH-5442 BGH-5538 BGH-5591A BGH-5051 BGH-4459A Jabras BGH-1992 BGH-305A BGH-5630A BGH-7219A BGH-5598A BGH-4453 BGH-5466 Jacarezinho BGH-4281 BGH-5473A BGH-1961 BGH-5649A BGH-5653 BGH-6155 BGH-5440A |
| 2        | BGH-5472A BGH-5544A BGH-5556A BGH-5361A BGH-3333A BGH-5453A BGH-6590 BGH-5485A                                                                                                                                                                                                                                                                                                                                                                                                                                                                                                                                                                                                                                                                                                                           |
| 3        | BGH-1749 BGH-5456A                                                                                                                                                                                                                                                                                                                                                                                                                                                                                                                                                                                                                                                                                                                                                                                       |
| 4        | BGH-1945A                                                                                                                                                                                                                                                                                                                                                                                                                                                                                                                                                                                                                                                                                                                                                                                                |
| 5        | BGH-4610                                                                                                                                                                                                                                                                                                                                                                                                                                                                                                                                                                                                                                                                                                                                                                                                 |

269

270 Group 5, formed by the accession BGH-4610A, presented the highest average ( $\mu+g$ )  
 271 value for SOP, estimated at 0.277 t ha<sup>-1</sup>. Group 2, formed by the accessions BGH-5472A, BGH-  
 272 5544A, BGH-5556A, BGH-5361A, BGH-5453A, BGH-3333A, BGH-6590, and BGH-5485A,  
 273 also presented a high average ( $\mu+g$ ) value for SOP, estimated at 0.19 t ha<sup>-1</sup> (Tables 2 and 3).

274 Regarding the fatty acid content of seed oil, group 3, formed by the accessions BGH-  
 275 5456A and BGH-1749, presented the highest average ( $\mu+g$ ) value for oleic acid content  
 276 (34.18%), followed by group 2 (30.62%). Group 3, formed by the accessions BGH-5456A and  
 277 BGH-1749, presented the lowest average ( $\mu+g$ ) value for linoleic acid content (43.16%)  
 278 (Tables 2 and 3).

279

280

281

282

283

284

285 **Table 3.** Grouping of genotypic averages of the accession groups based on Tocher's method  
286 of average grouping

287

| Clusters | SOP     | Oleico   | Linoleico | PUFA     |
|----------|---------|----------|-----------|----------|
| 1        | 0.087 b | 22.996 b | 51.850 b  | 51.864 b |
| 2        | 0.198 a | 30.626 a | 46.482 a  | 46.506 a |
| 3        | 0.041 b | 34.184 a | 43.168 a  | 43.186 a |
| 4        | 0.046 b | 22.012 b | 51.873 b  | 52.121 b |
| 5        | 0.277 a | 22.759 b | 51.820 b  | 51.835 b |

288

289

290

291

292 The genotypic averages followed by the same letters in the column do not differ from one another based  
293 on the Tocher's method of average grouping.  
294

### 295 **3.4 Principal components analysis**

296 The first three principal components (PCs) explained 82.13% of total variation among  
297 accession in terms of characteristics related to SOP and fatty acid profiles. PC1 explained  
298 47.16% of total variation. The oleic acid:linoleic acid ratio and oleic acid content were the  
299 characteristics with the highest positive loading, while linoleic acid content and PUFA content  
300 were the characteristics with the highest negative loading on PC1 (Figure 3).

301

302

303

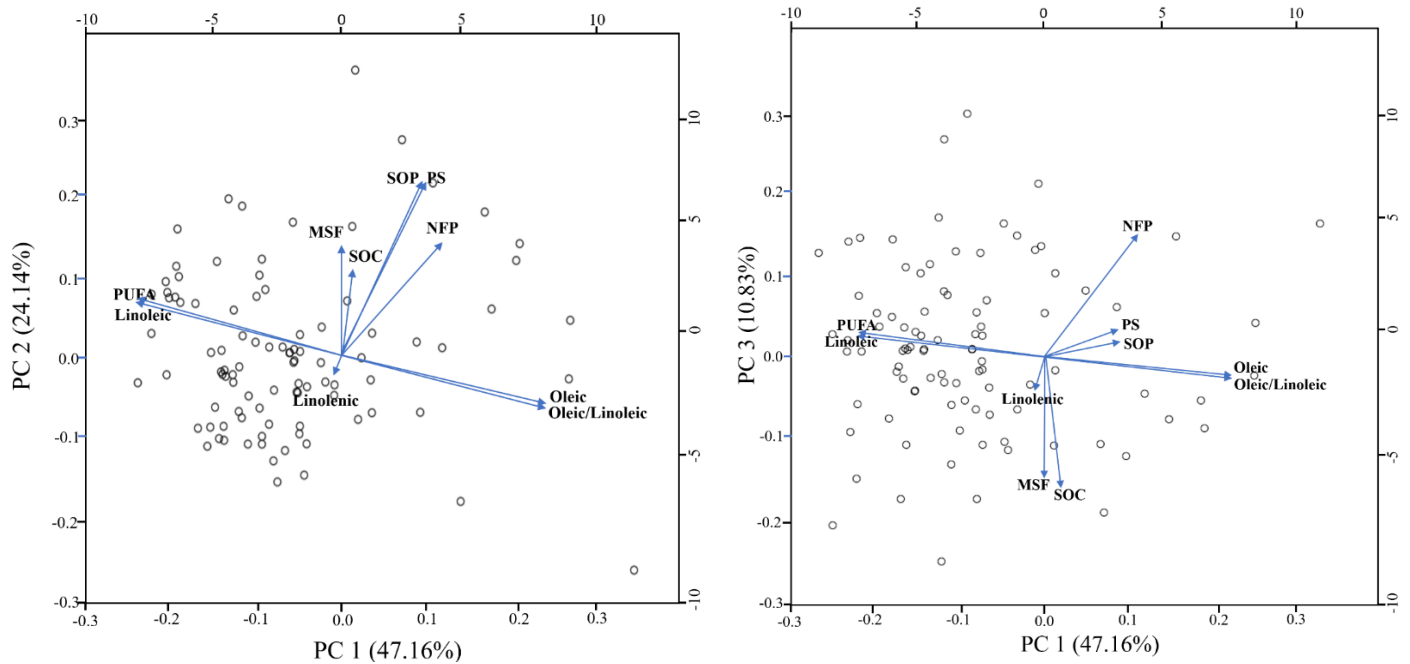

304 **Figure 3.** Dispersion of characteristics related to seed oil productivity and fatty acid profile in  
305 relation to the first three principal components. Number of fruits per plant (NFP), mass of seeds  
306 per fruit (MSF), productivity of seeds (PS), seed oil content (SOC), seed oil productivity (SOP),  
307 and polyunsaturated fatty acid (PUFA).

308 PC2 explained 24.14% of total variation, and PS, SOP, and MSF were the  
309 characteristics with the highest positive loading on this PC. PC3 explained 10.83% of total  
310 variation, and SOC and MSF were the characteristics with the highest loading on this PC.

311 Furthermore, PCA revealed the relationships between the characteristics. Along PC1,  
312 SOP was strongly and positively correlated with PS and NFP; moreover, along the same PC,  
313 there was a strong positive correlation between oleic acid content and oleic acid:linoleic acid  
314 ratio and a strong negative correlation between linoleic acid content and PUFA content (Figure  
315 3).

### 316 3.5 Identification of promising accessions in terms of SOP and fatty acid profiles

317 Among the tested accessions, the ( $\mu$ +g) estimate for SOP ranged from 0.14 to 0.27 t  
318  $\text{ha}^{-1}$ , which was much higher than the general average for accessions (0.05 t  $\text{ha}^{-1}$ ). Notably, the



319 accessions BGH-4610A, BGH-5485A, BGH-6590, BGH-5556A, BGH-5472A, and BGH-  
320 5544A were the most promising in terms of SOP, with values close to 0.20 t ha<sup>-1</sup> (Table 4).

321 Among fatty acids of seed oil, oleic acid content showed the highest ( $\mu$ +g) amplitude  
322 (17.71 to 37.20%) (Figure 4). Associated with this, the ( $\mu$ +g) estimates for oleic acid content  
323 among the selected accessions ranged from 27.28 to 37.20% (Table 4). The accessions BGH-  
324 5456A, BGH-3333A, BGH-5361A, BGH-5472A, BGH-5544A, BGH-1749, BGH-5653, and  
325 BGH-5453A were the most promising in terms of oleic acid content, with values close to  
326 30.00%.

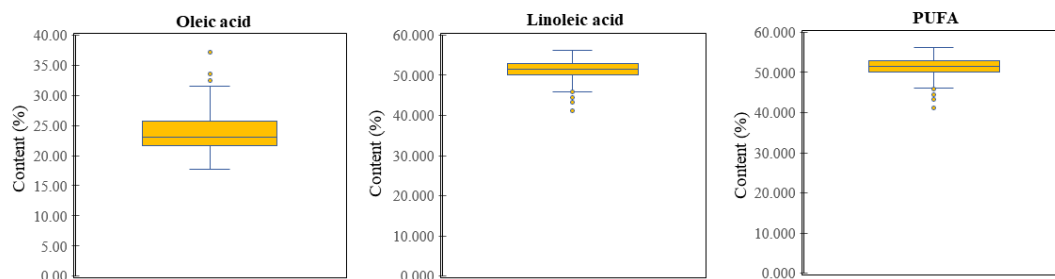

327 **Figure 4.** Box plots showing the variability in the oleic, linoleic, and polyunsaturated fatty acid  
328 content in the seed oil of the tested accessions.

329 Among the selected accessions, the ( $\mu$ +g) estimate for linoleic content ranged from  
330 41.09 to 48.77%. The accessions BGH-5456A, BGH-3333A, BGH-5361A, BGH-1749, BGH-  
331 5544A, and BGH-5556A expressed the lowest estimates for linoleic acid content, with values  
332 close to 40.00% (Table 4).

333 The ( $\mu$ +g) estimates for oleic acid:linoleic acid ratio ranged from 1.00 to 0.57 among  
334 the selected accessions, and the accessions BGH-5456A, BGH-5361A, BGH-3333A, BGH-  
335 1749, BGH-5472A, and BGH-5544A expressed the lowest estimates, with values close to 0.75.  
336 The ( $\mu$ +g) estimates for PUFA content ranged from 41.12 to 48.78%, and the accessions with  
337 the lowest estimates were BGH-5456A, BGH-3333A, BGH-5361A, BGH-1749, and BGH-  
338 5544A, with values close to 40% (Table 4).

339 **Table 4.** Estimates of genotypic values (g) and environmental interaction-free genotypic values  
 340 ( $\mu+g$ ) for seed oil productivity and fatty acid profiles

| Accessions | SOP   |           | Accessions | Oleic  |           | Accessions | Linoleic |           |
|------------|-------|-----------|------------|--------|-----------|------------|----------|-----------|
|            | g     | $\mu + g$ |            | g      | $\mu + g$ |            | g        | $\mu + g$ |
| BGH-4610A  | 0.227 | 0.277     | BGH-5456A  | 12.651 | 37.201    | BGH-5456A  | -9.563   | 41.097    |
| BGH-5485A  | 0.203 | 0.253     | BGH-3333A  | 9.458  | 34.008    | BGH-3333A  | -7.354   | 43.306    |
| BGH-6590   | 0.176 | 0.226     | BGH-5361A  | 8.987  | 33.537    | BGH-5361A  | -6.129   | 44.531    |
| BGH-5556A  | 0.174 | 0.224     | BGH-5472A  | 7.965  | 32.515    | BGH-1749   | -5.421   | 45.239    |
| BGH-5472A  | 0.166 | 0.216     | BGH-5544A  | 6.913  | 31.463    | BGH-5544A  | -4.821   | 45.839    |
| BGH-5544A  | 0.152 | 0.202     | BGH-1749   | 6.617  | 31.167    | BGH-5556A  | -4.663   | 45.997    |
| BGH-5440A  | 0.133 | 0.183     | BGH-5653   | 5.904  | 30.454    | BGH-5453A  | -4.262   | 46.398    |
| BGH-5630A  | 0.126 | 0.176     | BGH-5453A  | 5.702  | 30.252    | BGH-5472A  | -4.021   | 46.639    |
| BGH-4281   | 0.126 | 0.176     | BGH-6155   | 5.128  | 29.678    | BGH-6155   | -3.976   | 46.684    |
| BGH-5473A  | 0.126 | 0.176     | BGH-5466   | 5.042  | 29.592    | BGH-5653   | -3.408   | 47.252    |
| BGH-5361A  | 0.123 | 0.173     | BGH-5556A  | 4.515  | 29.065    | BGH-5648   | -2.367   | 48.293    |
| BGH-5453A  | 0.103 | 0.153     | BGH-6590   | 3.384  | 27.934    | BGH-5466   | -2.315   | 48.345    |
| BGH-4287A  | 0.096 | 0.146     | BGH-5639   | 2.752  | 27.302    | BGH-5639   | -1.938   | 48.722    |
| BGH-5598A  | 0.093 | 0.143     | BGH-5648   | 2.733  | 27.283    | BGH-5624A  | -1.889   | 48.771    |
| AO         |       | 0.050     | OA         |        | 24.55     | OA         |          | 50.66     |
| AS         |       | 0.195     | SA         |        | 30.818    | SA         |          | 46.222    |

  

| Accessions | Linolenic |           | Accessions | Oleic/Linoleic |           | Accessions | PUFAs  |           |
|------------|-----------|-----------|------------|----------------|-----------|------------|--------|-----------|
|            | g         | $\mu + g$ |            | g              | $\mu + g$ |            | g      | $\mu + g$ |
| BGH-5455A  | -0.180    | 0.000     | BGH-5456A  | 0.959          | 1.008     | BGH-5456A  | -9.555 | 41.125    |
| BGH-4598A  | -0.175    | 0.005     | BGH-5361A  | 0.789          | 0.838     | BGH-3333A  | -7.348 | 43.332    |
| BGH-1749   | -0.175    | 0.005     | BGH-3333A  | 0.768          | 0.817     | BGH-5361A  | -6.131 | 44.549    |
| BGH-5301   | -0.174    | 0.006     | BGH-1749   | 0.707          | 0.756     | BGH-1749   | -5.433 | 45.247    |
| BGH-1927   | -0.173    | 0.007     | BGH-5472A  | 0.684          | 0.733     | BGH-5544A  | -4.821 | 45.859    |
| BGH-5240   | -0.173    | 0.007     | BGH-5544A  | 0.676          | 0.725     | BGH-5556A  | -4.661 | 46.019    |
| BGH-4287A  | -0.172    | 0.008     | BGH-5453A  | 0.636          | 0.685     | BGH-5453A  | -4.261 | 46.419    |
| BGH-5630A  | -0.171    | 0.009     | BGH-5653   | 0.612          | 0.661     | BGH-5472A  | -3.989 | 46.691    |
| BGH-5051   | -0.171    | 0.009     | BGH-6155   | 0.597          | 0.646     | BGH-6155   | -3.974 | 46.706    |
| BGH-5248   | -0.170    | 0.010     | BGH-5556A  | 0.595          | 0.644     | BGH-5653   | -3.407 | 47.273    |
| BGH-5591A  | -0.170    | 0.010     | BGH-5466   | 0.584          | 0.633     | BGH-5648   | -2.368 | 48.312    |
| BGH-4454A  | -0.169    | 0.011     | BGH-6590   | 0.527          | 0.576     | BGH-5466   | -2.311 | 48.369    |
| BGH-5224   | -0.169    | 0.011     | BGH-5648   | 0.527          | 0.576     | BGH-5639   | -1.940 | 48.740    |
| BGH-5485A  | -0.169    | 0.011     | BGH-5639   | 0.521          | 0.570     | BGH-5624A  | -1.895 | 48.785    |
| AO         |           | 0.180     | OA         |                | 0.049     | OA         |        | 50.68     |
| AS         |           | 0.008     | SA         |                | 0.705     | SA         |        | 46.245    |

Seed oil productivity (SOP), polyunsaturated fatty acids (PUFAs), original average (OA), and average of selected genotypes (AS).

341

342

343

344

345

## 346 4. DISCUSSION

### 347 4.1 Variance components and genetic-statistical parameters of characteristics related to 348 SOP and fatty acid profiles

349 The greatest genotypic variances for MSF and PS, which were associated with their  
350 high heritability (0.89% and 0.70%, respectively), confirmed the marked genetic variability in  
351 these two characteristics, particularly for MSF, in the germplasm (Table 1). From these results,  
352 the predicted selection gains were significant and up to 29.39 g for MSF and 0.26 t·ha<sup>-1</sup> for PS  
353 (Table 1). Consistent with our results, remarkable variability in characteristics related to seed  
354 production, such as MSF and PS, in the *C. moschata* germplasm has been reported previously  
355 (Lima Neto, 2013; Darrudi et al., 2018; Oliveira et al., 2020).

356 Regarding the fatty acid profile of seed oil, the highest genotypic variance and very  
357 high heritability for the content of oleic acid, demonstrate the high genetic variability and  
358 feasibility of identifying *C. moschata* accessions that can produce oil with higher oleic acid  
359 content. As a result, the predicted selection gain for oleic acid was 6.99%, which corresponded  
360 to the greatest selection gain among the components of seed oil (Table 1). Furthermore, the  
361 linoleic acid and PUFA content exhibited high genetic variability, also demonstrating the  
362 feasibility of identifying *C. moschata* accessions that can produce oil with lower linoleic acid  
363 content, providing predicted selection gains of -5.12% for this first fatty acid (Table 1).

364 The results for the fatty acid profiles obtained in the present study are consistent with  
365 previously reported profiles (Sobreira, 2013; Jarret et al., 2013). For instance, Jarret et al.  
366 (2013) evaluated the fatty acid profile of 38 seed samples corresponding to *C. moschata*  
367 accessions in the Plant Germplasm Collection of the United States Department of Agriculture,  
368 Griffin, and reported that oleic acid presented the greatest amplitude (10 to 53.80%), followed  
369 by linoleic acid (24.70 to 61.70%). Previous studies also corroborate high linoleic and oleic  
370 acid content, low palmitic acid content, and trace stearic and linolenic acid content in *C.*

371 *moschata* seed oil (Applequist et al., 2006; Kim et al., 2012; Veronezi and Jorge, 2015). To the  
372 best of our knowledge, however, no previous study on *C. moschata* has analyzed the genetic  
373 parameters associated with the components of the fatty acid profile of seed oil, such as genetic  
374 variance, heritability, and selection gain.

375 Studies on other oilseeds, such as soybean, rapeseed, and sunflower, have often reported  
376 variations in the fatty acid profiles among germplasm samples and attributed such variations to  
377 genetic factors (Hemingway, et al., 2015; Yol et al., 2017). Given the quantitative nature of the  
378 fatty acid profile, it is reasonable to assume that this characteristic is also influenced by  
379 environmental factors, and some studies have shown the strong influence of environmental  
380 factors, such as temperature, on the fatty acid profiles of various oilseeds (Werteker et al.,  
381 2010). Corroborating the findings of Gomes et al. (2020), most of the accessions evaluated in  
382 the present study were acquired from family farmers, who do not typically select accessions  
383 for the characteristics of seed or seed oil, which possibly contributed to the maintenance of  
384 high variability in these traits.

#### 385 **4.2 Correlations of characteristics related to SOP and fatty acid profiles**

386 The phenotypic correlations of NFP, MSF, and PS with SOP ranged from moderate to  
387 very strong ( $p < 0.001$ ), corroborating the notion that these characteristics are directly related  
388 to SOP (Figure 2). The genotypic correlations of these first three variables with SOP were very  
389 similar to the phenotypic correlations, indicating that the relationship of the variables NFP,  
390 MSF, and PS with SOP may be attributed to genetic factors (Figure 2). These trends were  
391 repeated for correlations of other variables, which tended to express genotypic correlations  
392 similar to the phenotypic.

393 In the present study, we expected the variables NFP, MSF, and PS to be strongly  
394 correlated with SOP, consistent with previous reports of strong correlation between seed yield  
395 and oil productivity (Assefa et al., 2018). Thus, in addition to PS and MSF, NFP appears to be

396 a determinant of greater SOP in *C. moschata*. These correlations of SOP with its directly  
397 associated characteristics can be strategic to guide indirect selection aimed at increasing *C.*  
398 *moschata* oil productivity. Thus, the selection of genotypes with higher PS and MSF may be a  
399 promising alternative to obtain greater SOP in *C. moschata*.

400 The positive correlations of SOP with oleic acid content and oleic acid:linoleic acid  
401 ratio observed in the present study suggest the feasibility of obtaining greater oil productivity  
402 while maintaining a desirable oil profile, with high oleic acid content and oleic acid:linoleic  
403 acid ratio (Figure 2). Additionally, the negative correlations of SOP with linoleic acid and  
404 PUFA content indicate the feasibility of obtaining greater SOP while maintaining lower PUFA  
405 such as the linoleic acid. To the best of our knowledge, no study on *C. moschata* has addressed  
406 the relationship between SOP and components of seed oil fatty acid profile. Meanwhile, studies  
407 on other oilseeds, such as peanut, have reported weak phenotypic correlations between SOP  
408 and oleic acid content (-0.034) (Yol et al., 2017), suggesting a small change in the acid content  
409 with increase in oil productivity in this crop. In contrast to the present study, Yol et al. (2017)  
410 reported a weak but positive correlation between SOP and oleic acid content.

411 Regarding the correlations among the components of oil fatty acid profile, the strong,  
412 negative but significant correlations of oleic acid content with linoleic acid and PUFA content  
413 indicate an antagonistic relationship between these components of *C. moschata* seed oil (Figure  
414 2). The phenotypic correlations among these characteristics may be attributed to environmental  
415 and genetic factors. For instance, environmental factors, such as temperature, may strongly  
416 influence the correlations among fatty acids such as oleic and linoleic acid. In line with this,  
417 studies on other oilseeds, such as soybean, have shown that the oleic acid content of oil tends  
418 to decrease with increasing temperature, contrary to that observed for linoleic acid content  
419 (Bachlava et al., 2008), corroborating the negative correlations among these two fatty acids  
420 observed in the present study.

421           The metabolic pathways of fatty acids may be the key genetic factor responsible for the  
422 correlations among the components of oil fatty acid profile. In this context, desaturases in the  
423 plastids and endoplasmic reticulum play a central role in fatty acid synthesis and catalyze their  
424 conversion to MUFAs or PUFAs (Long et al., 2018). Among these enzymes, delta-12 fatty acid  
425 desaturase 2 ( $\Delta 12$ -FAD2) converts oleic acid precursors into linoleic acid precursors (Ohlrogge  
426 and Browse, 1995), and according to Dehghan and Yarizade (2014), the *FAD2* gene family is  
427 rather ubiquitous and diverse in plants. Thus, the strong negative correlation between oleic and  
428 linoleic acid content observed in the present study may also be related to the action of FAD2  
429 during the biosynthesis of these two fatty acids.

430           The analysis of correlations among characteristics is an important subsidy for plant  
431 breeding, which must contemplate several variables simultaneously (Dias et al., 2017), proving  
432 very useful when determining selection strategies. As shown in the present study, the plant  
433 germplasms maintained in banks commonly constitute a representative sample of the species  
434 gene pool, thus providing comprehensive information on the relationships among germplasm  
435 characteristics, which makes the correlation analysis very useful during the initial evaluation  
436 of plant germplasms conserved in banks. The information on correlations among the  
437 components of seed oil observed in the present study may be particularly meaningful in  
438 breeding programs aimed at improving the fatty acid profile of *C. moschata* seed oil,  
439 considering the feasibility of increasing oleic acid content while decreasing PUFA content,  
440 given the strong negative correlation between these two components.

#### 441 **4.3 Clustering and variability of accessions based on characteristics related to SOP and** 442 **fatty acid profiles**

443           The clustering of accessions confirmed the variability in characteristics related to SOP and  
444 fatty acid profiles among the studied accessions (Table 2). This clustering is consistent with  
445 the high estimates of genotypic variance and heritability for the evaluated characteristics

446 related to SOP, including MSF and PS, as well as those related to the fatty acid profile of seed  
447 oil, including oleic and linoleic acid content (Table 1). The variability observed among the  
448 accessions tested in the present study also corroborates previous reports emphasizing  
449 remarkable variability in both agromorphological and molecular characteristics in the *C.*  
450 *moschata* germplasm (Ferriol et al., 2004; Barboza et al., 2012; Ferreira et al., 2016).

451 The clustering of accessions in the present study did not reflect a greater similarity  
452 between accessions from the same state or geographic region, consistent with the reports of  
453 agromorphological characteristics of the *C. moschata* germplasm from different geographic  
454 regions (Moura, 2003; Gomes et al., 2020). Unlike the present study, previous studies involving  
455 the analysis of fatty acid profile of the seeds of other oilseed crops, such as soybean, have  
456 reported that germplasms from regions at higher latitudes tended to express higher palmitic,  
457 stearic, and oleic acid content than germplasms from lower latitudes (Wu et al., 2017;  
458 Abdelghany et al., 2020), suggesting a greater similarity between the germplasms from the  
459 same region. In this line, Bachlava et al. (2008) observed that the oleic acid content of soybean  
460 tended to increase from lower to higher latitudes, indicating increase in the content of this fatty  
461 acid with decrease in temperature, contrary to the trends for linoleic and linolenic acid.  
462 Similarly, Song et al. (2016) observed that the oleic acid content of soybean seeds was  
463 negatively correlated with the duration of sunlight incidence. Thus, the greater similarity  
464 between the soybean germplasms from the same region may reflect regional ecogeographic  
465 characteristics; different from the results of the present study.

466 Already present in the diet of native peoples (Piperno et al., 2003; Dillehay et al., 2007),  
467 *C. moschata* is widely cultivated in Latin America, which is an important center of diversity  
468 for this vegetable. In addition, previous studies have highlighted the variability in the Brazilian  
469 germplasm of *C. moschata* (De Lima et al., 2016; Ferreira et al., 2016; Gomes et al., 2020),  
470 possibly as a result of the adaptation of this germplasm to a wide ecological range, constituted

471 by diverse edaphoclimatic conditions. Additionally, the intrinsic characteristics of *C.*  
472 *moschata*, such as the occurrence of natural hybridization across populations, associated with  
473 the processes of selection and seed exchange practiced by populations involved in its  
474 cultivation, also contribute to the variability in the Brazilian germplasm of this vegetable  
475 (Gomes et al., 2020).

476 The similarity between accessions of different geographic regions observed in the  
477 present study suggests the adaptability of the germplasm, indicating the feasibility of its  
478 cultivation under edaphoclimatic conditions different from those in its regions of origin.  
479 Compared with other crops, such as soybean (Abdelghany et al., 2020), the possible  
480 adaptability of *C. moschata* germplasm observed in the present study represents an opportunity  
481 to meet the diverse demands of various cultivation regions and systems of this vegetable,  
482 specifically in Brazil, which is characterized by its continental dimension.

483 Additionally, crossbreeding between divergent genotypes has been conveniently  
484 explored in *C. moschata*, aiming at the exploitation of hybrid vigor for aspects related to growth  
485 habit, fruit and seed production, as well as for fruit chemical–nutritional aspects (El-Tahawey  
486 et al., 2015; Kumar et al., 2018). Based on genotypic data and environmental interaction-free  
487 genotypic values, our results of variability analysis will be particularly useful to assist the  
488 crossing of promising genotypes aimed at the exploration of hybrid vigor for characteristics  
489 related to SOP and fatty acid profiles.

#### 490 **4.4 Principal components analysis**

491 In consonance with their respective variance components and genetic parameters (Table  
492 1), the oleic acid, linoleic acid, and PUFA content made the greatest contributions to the  
493 discrimination of the genotypes in PCA, confirming the high variability of these characteristics  
494 (Figure 3). The results of PCA regarding the variability of accessions were consistent with the



495 results of clustering analysis (Table 2), also corroborating the strong positive correlations of  
496 PS with SOP, as well as the positive correlation of SOP with the oleic acid content (Figure 2).

#### 497 **4.5 Identification of promising accessions in terms of SOP and fatty acid profiles**

498 Based on their highest genotypic averages for SOP, the groups 5 and 2 were identified  
499 as the most promising for this characteristic (Table 3). Consistent with this result, *per se*  
500 analysis identified accession BGH-4610 from group 5 as the most promising in terms of SOP,  
501 with the ( $\mu+g$ ) estimate of 0.27 t ha<sup>-1</sup> (Table 4). In addition, accessions BGH-5485A, BGH-  
502 6590, BGH-5556A, BGH-5472A, and BGH-5544A from group 2 were also identified as  
503 promising in terms of SOP in *per se* analysis, with the ( $\mu+g$ ) estimate of ~0.20 t ha<sup>-1</sup> (Table 4).

504 The groups 3 and 2 were identified as the most promising in terms of SOP with higher  
505 oleic acid content (Table 4). Associated with this, the accession BGH-5456A from group 3 was  
506 identified as most promising in terms of high oleic acid content in *per se* analysis, with the  
507 ( $\mu+g$ ) estimate of 37.20% (Table 4). The accessions BGH-3333A, BGH-5361A, BGH-5472A,  
508 BGH-5544A, and BGH-5453A from group 2 and the accession BGH-1749 from group 3 were  
509 also identified as promising in terms of high oleic acid content, with the ( $\mu+g$ ) estimate of  
510 ~30.00% (Table 4). The identification of promising groups and *per se* identification of  
511 accessions with high oleic acid content in the seed oil are associated with the high amplitude  
512 of ( $\mu+g$ ) estimates for this characteristic (Figure 4).

513 The groups 3 and 2 also presented the lowest averages for linoleic acid and PUFA  
514 content, confirming them as the most promising in terms SOP with lower PUFA content (Table  
515 4). Consistent with this result, the accession BGH-5456A, BGH-3333A, BGH-5361A, BGH-  
516 5544A, BGH-5556A, and BGH-1749 were identified as promising in terms of low linoleic acid  
517 content, with the ( $\mu+g$ ) estimate of ~45% (Table 4). In *per se* analysis, the accessions identified  
518 as the most promising in terms of low linoleic acid also were the most promising in terms of  
519 low PUFA content, demonstrating the predominance of linoleic acid among PUFAs.

520           Recently, the development of cultivars with an oil profile that is better suited to human  
521 nutrition and health has been emphasized in the genetic breeding of oilseed crops. This is in  
522 agreement with a series of studies demonstrating the association between the consumption of  
523 lipid sources predominantly comprising saturated fatty acids and the high risk of  
524 cardiometabolic pathologies, particularly cardiovascular diseases and type II diabetes mellitus  
525 (Harris et al., 2009; Keys et al., 2017; Wu et al., 2019). This has encouraged the replacement  
526 of saturated lipids in human food by unsaturated fatty acids, with a particular focus on vegetable  
527 oils—the main source of unsaturated fatty acids in the human diet.

528           Associated with high levels of unsaturated fatty acids, vegetable oils should ideally have  
529 high stability against environmental stressors, such as humidity, light, heat, and oxygen. These  
530 oils must also be resistant to oxidative actions, which are related to the production of secondary  
531 components responsible for triggering allergic responses and cardiovascular diseases, such as  
532 atherosclerosis (Yanishlieva et al., 2001; Garbin et al., 2013), also responsible deteriorating the  
533 sensory quality (Choe and Min, 2006) and reduce the shelf life of oils (Xie et al., 2019). Given  
534 these demands, breeding programs for oilseed crops such as soybean, rapeseed, and corn have  
535 emphasized the development of cultivars that produce more stable oils, prioritizing the increase  
536 in the content of oleic acid, a MUFA, which has greater oxidative stability (Burton et al., 2006;  
537 Bachlava et al., 2008; Wang et al., 2009; Long et al., 2018). In this line, some studies have  
538 confirmed the higher oxidative stability of oleic acid [C18: 1 ( $\Delta^9$ )] compared to PUFAs such  
539 as linoleic acid [C18: 2 ( $\Delta^9, 12$ )] and linolenic acid [C18: 3 ( $\Delta^9, 12, 15$ )], indicating that oleic acid  
540 is 10 times more stable than linoleic acid and 20 times more stable than linolenic acid (Liu et  
541 al., 1992). Thus, genetic breeding for improving the fatty acid profile of *C. moschata* seed oil  
542 should simultaneously target an increase in oleic acid content and decrease in polyunsaturated  
543 fatty acids, particularly linoleic acid content, aiming at greater nutritional and physicochemical  
544 quality of oil.

545           The identification of *C. moschata* accessions with high oleic acid content in the seed  
546 oil indicates the feasibility of identifying accessions that produce seed oil with higher  
547 nutritional quality and stability. Of note, *C. moschata* seed oil contains high levels of bioactive  
548 components, such as vitamin E and carotenoids (Veronezi and Jorge, 2012), which are  
549 important antioxidants in the human diet and protect the oil against oxidative processes.  
550 Despite of their high nutritional value, a large portion of seeds produced during *C. moschata*  
551 cultivation is still discarded (Li et al., 2019), particularly in Brazil. As highlighted by Gomes  
552 et al. (2020), the use of *C. moschata* seeds for oil production represents an alternative strategy  
553 to complement the diet, in addition to increasing the income of farmers involved in the  
554 production of this vegetable.

555           To the best of our knowledge, the present study is the first to analyze the SOP and fatty  
556 acid profile of *C. moschata* based on a relatively large number of accessions representative of  
557 different geographic regions of Brazil. Our results demonstrate the marked potential of some  
558 *C. moschata* accessions for oil production, as confirmed by the *per se* identification of  
559 accessions with high SOP and high oleic acid content in the oil. Our results corroborate the  
560 productive potential as well as the nutritional and physicochemical quality of seed oil from the  
561 Brazilian germplasm of *C. moschata*.

562

563

564

565

566

567

568

569

570 **5. CONCLUSIONS**

571 The tested accessions expressed high genetic variability in terms of MSF and PS,  
572 providing the predicted selection gains of 29.39 g and 0.26 ha<sup>-1</sup>, respectively.

573 Phenotypic and genotypic correlations indicated that a greater *C. moschata* SOP can be  
574 achieved by selecting for higher PS and MSF. Correlations also indicated that a greater SOP  
575 can be obtained while maintaining high oleic fatty acid content and low linoleic acid content,  
576 providing oil with better nutritional and chemical quality.

577 In the analysis of variability, the 91 accessions tested in this study were clustered into  
578 five groups, allowing the identification of the most promising groups in terms of greater SOP  
579 and higher oleic acid content in the oil, an approach that will guide the use of this germplasm  
580 in breeding programs aimed at improving the SOP and fatty acid profile.

581 *Per se* analysis identified the accessions BGH-4610, BGH-5485A, BGH-6590, BGH-  
582 5556A, BGH-5472A, and BGH-5544A as the most promising in terms of SOP, with the ( $\mu$ +g)  
583 estimate of ~0.20 t ha<sup>-1</sup>. Accessions BGH-5456A, BGH-3333A, BGH-5361A, BGH-5472A,  
584 BGH-5544A, BGH-5453A, and BGH-1749 were identified as the most promising in terms of  
585 higher oleic content in oil were, with the ( $\mu$ +g) estimate of ~30%, and most of these accessions  
586 were also the most promising in terms of lower linoleic acid content in oil, with the ( $\mu$ +g)  
587 estimate ~40%. Therefore, part of the *C. moschata* germplasm evaluated in the present study  
588 is a promising source for the genetic improvement of SOP and fatty acid profile, aiming at the  
589 production of oil with better nutritional and physicochemical quality.

590

591

592

593

594 **AUTHOR CONTRIBUTIONS**

595 **Conceptualization:** Derly José Henriques da Silva.

596 **Data curation:** Ronaldo Silva Gomes, Ronaldo Machado Júnior, Cleverson Freitas de  
597 Almeida, Rebeca Lourenço de Oliveira.

598

599 **Investigation:** Ronaldo Silva Gomes, Ronaldo Machado Júnior, Cleverson Freitas de Almeida,  
600 Rebeca Lourenço de Oliveira, Ednângelo Duarte Pereira, Fabio Teixeira Delazari.

601

602 **Software:** Rafael Ravaneli Chagas and Ronaldo Silva Gomes.

603 **Supervision:** Derly José Henriques da Silva.

604 **Writing – original draft:** Ronaldo Silva Gomes.

605 **Writing – review & editing:** Ronaldo Silva Gomes, Derly José Henriques da Silva, Rebeca  
606 Lourenço de Oliveira, Cleverson Freitas de Almeida.

607

608 **FUNDING**

609 This work had support from the Fundação de Amparo à Pesquisa do Estado de Minas Gerais  
610 (FAPEMIG). This work was supported by the Coordenação de Aperfeiçoamento de Pessoal e  
611 Nível Superior (CAPES) [grant number 001]. This work had the support from the National  
612 Council of Technological and Scientific Development (CNPq), which corresponded to a  
613 doctorate scholarship (doctorate-GD grant), granted to the first author, Ronaldo Silva Gomes.

614 There was no additional external funding received for this study.

615

616

617

618

619

## 620 REFERENCES

- 621 Abdelghanya, A. M., Zhanga, S., Azama, M., Shaibua, A. S., Fenga, Y., Lia, Y., Tiana,  
622 Y., Honga, H., Lia, B., Suna, J., 2020. Profiling of seed fatty acid composition in 1025 Chinese  
623 soybean accessions from diverse ecoregions. *The Crop J.* 8, 635–644.  
624 <https://doi.org/10.1016/j.cj.2019.11.002>.
- 625 Applequist, W. L., Avula, B., Schaneberg, B.T., Wang, Y. H., Khan, I.A., 2006.  
626 Comparative fatty acid content of four *Cucurbita* species grown in a common (shared) garden.  
627 *J. Food Compos. Anal.* 19, 606–611. <https://doi.org/10.1016/j.jfca.2006.01.001>.
- 628 Assefa, Y., Bajjalieh, N., Archontoulis, S., Casteel, S., Davidson, D., Kovács, P.,  
629 Naeve, P., Ciampitti, I. A., 2018. Spatial characterization of soybean yield and quality (amino  
630 acids, oil, and protein) for United States. *Sci Rep-UK.* 8, 1-11. <https://doi:10.1038/s41598-018-32895-0>.
- 631 Barboza, N., Albertazzi, F. J., Sibaja-Cordero, J. A., Mora-Umana, F., Astorga, C.,  
632 Ramírez, P., 2012. Analysis of genetic diversity of *Cucurbita moschata* (D.) germplasm  
633 accessions from Mesoamerica revealed by PCR SSCP and chloroplast sequence data. *Sci.*  
634 *Hortic-Amsterdam.* 134, 60-71. <https://doi.org/10.1016/j.scienta.2011.10.028>.
- 635 Bates, D., Maechler, M., Bolker, B., Walker, S., 2015. Fitting linear mixed-effects  
636 models using lme4. *J. Stat. Softw.* 67, 1-48. <https://doi.org/10.18637/jss.v067.i01>.
- 637 Bachlava, E., Burton, J. W., Brownie, C., Wang, S., Auclair, J., Cardinal, A. J., 2008.  
638 Heritability of oleic acid content in soybean seed oil and its genetic correlation with fatty acid  
639 and agronomic traits. *Crop Sci.* 48, 1764–1772. <https://doi:10.2135/cropsci2004-0769>.
- 640 Burton, J.W., Wilson, R.F., Rebetzke, G. J., Pantalone, V. R., 2006. Registration of  
641 N98-4445A mid-oleic soybean germplasm line. *Crop Sci.* 46, 1010–1012.  
642 <https://doi:10.2135/cropsci2004-0769>.
- 643 Carvalho, L. M. J. De., Gomes, P. B., Godoy, R. L. De O., Pacheco, S., Do monte, P.  
644 H. F., De Carvalho, J. L. V., Nutti, M. R., Neves, A. C. L., Vieira, A. C. R. A., Ramos, S. R.  
645 R., 2012. Total carotenoid content,  $\alpha$ -carotene and  $\beta$ -carotene, of landrace pumpkins  
646 (*Cucurbita moschata* Duch): A preliminary study. *Food Res. Int.* 47, 237- 340.  
647 <https://doi.org/10.1016/j.foodres.2011.07.040>.
- 648 Choe, E., Min, D. B., 2006. Mechanisms and factors for edible oil oxidation. *Compr.*  
649 *Rev. Food Sci. F.* 5, 169–186. <https://doi.org/10.1111/j.1541-4337.2006.00009.x>.
- 650 Cruz, C. D., 2013. GENES—a software package for analysis in experimental statistics  
651 and quantitative genetics. *Acta Sci-Agron.* 35, 271-276. [https://doi:](https://doi:10.4025/actasciagron.v35i3.21251)  
652 [10.4025/actasciagron.v35i3.21251](https://doi:10.4025/actasciagron.v35i3.21251).
- 653 Cullis, B. R., Smith, A. B., Coombes, N. E., 2006. On the design of early generation  
654 variety trials with correlated data. *J Agric Biol. Envir. S.* 11, 381-393. [https://doi:](https://doi:10.1198/108571106X154443)  
655 [10.1198/108571106X154443](https://doi:10.1198/108571106X154443).
- 656 Dash, P., Ghosh, G., 2017. Proteolytic and antioxidant activity of protein fractions of  
657 seeds of *Cucurbita moschata*. *Food Biosc.* 18, 1-  
658 8. <http://dx.doi.org/10.1016/j.fbio.2016.12.004>.
- 659 Darrudi, V. N., Soltania, F., Shokrpoura, M., Ercolanob, M. R., 2018. Genetic diversity  
660 of *Cucurbita pepo* L. and *Cucurbita moschata* Duchesne accessions using fruit and seed  
661 quantitative traits. *J. Appl. Res. Med. Arom. Plant.* 8, 60-66.  
662 <https://doi.org/10.1016/j.jarmap.2017.11.003>.
- 663 De Lima, G. K. L., De Queiroz, M. A., Silveira, L. M. da. 2016. Rescue of *Cucurbita*  
664 spp. germplasm in Rio Grande do Norte. *Ver. Caatinga.* 29, 257-262.  
665 <https://doi.org/10.1590/1983-21252016v29n130rc>.
- 666

- 667 Dehghan, N. F., Yarizade, K., 2014. Bioinformatics study of delta-12 fatty acid  
668 desaturase 2 (FAD2) gene in oilseeds. Mol. Biol. Rep. 41, 5077–5087. [https://doi:](https://doi.org/10.1007/s11033-014-3373-5)  
669 [10.1007/s11033-014-3373-5](https://doi.org/10.1007/s11033-014-3373-5).
- 670 Dias, F. dos S., Dos Santos, F. C., Gomes, R. S., Da Silva, D. C., Soares, D. de A.,  
671 Rosa, D. P., Da Silva, A. F., 2017. Path analysis in fruits of the buriti (*Mauritia flexuosa* L. f)  
672 in populations from the Brazilian Middle North Region. Tree Genet Genomes. 13, 1-6.  
673 <https://doi.org/10.1007/s11295-017-1205-1>.
- 674 Dillehay, T., Rossen, J., Andres, T. C., Williams, D. E., 2007. Pre-ceramic Adoption of  
675 peanut, squash, and cotton in Northern Peru. Science. 316, 1890-1893. [https://doi:](https://doi.org/10.1126/science.1141395)  
676 [10.1126/science.1141395](https://doi.org/10.1126/science.1141395).
- 677 El-Tahawey, M.A.F.A., Kandeel, A. M., Youssef, S. M. S., Abd El-Salam, M. M. M.,  
678 2015. Heterosis, potence ratio, combining ability and correlation of some economic traits in  
679 diallel crosses of pumpkins. Egypt J. Plant Breed. 19, 419 – 439.
- 680 Federer, W. T., 1956. Augmented or (Hoonuiaku) designs. Hawaiian Planter's Record.  
681 55, 191–208.
- 682 Ferreira, M. G., Salvador, F. V., Lima. M. N. R., 2016. Parâmetros genéticos,  
683 dissimilaridade e desempenho per se em acessos de abóbora. Horticult. Bras. 34, 537-546.  
684 <https://doi.org/10.1590/s0102-053620160413>.
- 685 Ferriol, M., Picó, B., De Córdova, P. F., Nuez, F., 2004. Molecular diversity of a  
686 germplasm collection of squash (*Cucurbita moschata*) determined by SRAP and AFLP  
687 markers. Crop Sci. 44, 653–664.
- 688 Food and Agriculture Organization of the United Nations- FAO STATE, 2020.  
689 <http://www.fao.org/faostat/em/#home/> (accessed 15 February 2021).
- 690 Fonseca, M. A., Queiroz, M. A. de., Lopes, J. F., Assis, J. G. de A., Romão, R. L.,  
691 Ramos, S. R.R., Do Carmo, C. A. S., Moura, M. C. L., Dias, R. C. S., Silveira, L. M. Da.,  
692 Barbieri, R. L., Da Silva, D. J. H., Noronha, S., 2015. Geographical distribution and  
693 conservation of *Cucurbita* in Brazil. Magistra. 27, 432–442.
- 694 Garbin, U., Baggio, E., Stranieri, C., Pasini, A., Manfro, S., Mozzini, C., Vallerio, P.,  
695 Lipari, G., Merigo, F., Guidi, G., Cominacini, L., Pasini, A.F., 2013. Expansion of necrotic  
696 core and shedding of Mertk receptor in human carotid plaques: a role for oxidized  
697 polyunsaturated fatty acids? Cardiovasc. Res. 97, 125–33. [https://doi: 10.1093/cvr/cvs301](https://doi.org/10.1093/cvr/cvs301).
- 698 Gomes, R. S., Machado Júnior, R., Cleverson, F. De A., Chagas, R. R., Oliveira, R. L.  
699 De., Delazari, F. T., Da Silva, D. J. H. 2020. Brazilian germplasm of winter squash (*Cucurbita*  
700 *moschata* D.) displays vast genetic variability, allowing identification of promising genotypes  
701 for agro-morphological traits. Plos One. 15, 1-16.  
702 <https://doi.org/10.1371/journal.pone.0230546>.
- 703 Harris, W. S., Mozaffarian, D., Rimm, E., Kris-Etherton, P., Rudel, L. L., Appel, L. J.,  
704 Engler, M. M., Engler, M. B., Sacks, F., 2009. Omega-6 fatty acids and risk for cardiovascular  
705 disease. A science advisory from the American Heart Association Nutrition Subcommittee of  
706 The Council on Nutrition, Physical Activity, and Metabolism; Council on Cardiovascular  
707 Nursing; and Council on Epidemiology and Prevention. Circulation. 119, 1-8. [https://doi:](https://doi.org/10.1161/circulationaha.108.191627)  
708 [10.1161/circulationaha.108.191627](https://doi.org/10.1161/circulationaha.108.191627).
- 709 Hemingway, J., Eskandari, M., Rajcan, I., 2015. Genetic and environmental effects on  
710 fatty acid composition in soybeans with potential use in the automotive industry. Crop Sci. 55,  
711 658-668. [https://doi: 10.2135/cropsci2014.06.0425](https://doi.org/10.2135/cropsci2014.06.0425).
- 712 Jarret, R. L., Levy, I. J., Potter, T. L., Cermak, S. C., Merrick, L. C., 2013. Seed oil  
713 content and fatty acid composition in a genebank collection of *Cucurbita moschata* Duchesne  
714 and *C. argyrosperma* C. Huber. Plant Genet. Resour-C. 11, 149-157.  
715 <http://doi:10.1017/S1479262112000512>.

- 716 Kumar, V., Mishra, D. P., Yadav, G. C., Yadav, S., 2018. Exploitation of heterobeltiosis  
717 and economic heterosis for horticultural yield, and its attributes and biochemical traits in  
718 pumpkin (*Cucurbita moschata* Duch. ex. Poir) under salt affected soil. *Curr. Sci. India.* 115,  
719 1550–156. [https://doi: 10.18520/cs/v115/i8/1550-1556](https://doi.org/10.18520/cs/v115/i8/1550-1556).
- 720 Keys, A., Menotti, A., Karvonen, M. J., Aravanis, C., Blackburn, H., Buzina, R.,  
721 Djordjevic, B. S., Dontas, A. S., Fidaza, F., Key, M. H., Kromhout, D., Nedeljkovic, S., Punsar,  
722 S., Seccareccia, F., Toshima, H., 2017. The diet and 15-year death rate in the seven countries  
723 study. *Am. J. Epidemiol.* 185, 1130-1142. [https://doi: 10.1093/aje/kwx101](https://doi.org/10.1093/aje/kwx101).
- 724 Kim, M. Y., Kim, E. J., Kim, Y-N., Choi, C., Lee, B-H., 2012. Comparison of the  
725 chemical compositions and nutritive values of various pumpkin (*Cucurbitaceae*) species and  
726 parts. *Nutr. Res. Pract.* 6, 21–27. <http://dx.doi.org/10.4162/nrp.2012.6.1.21>.
- 727 Li, H., 2019. Evaluation of bioactivity of butternut squash (*Cucurbita moschata* D.)  
728 seeds and skin. *Food Sci. Nutr.* 8, 3252–3261. [https://doi: 10.1002/fsn3.1602](https://doi.org/10.1002/fsn3.1602).
- 729 Lima Neto, I. S., 2013. Pré- melhoramento de abobora (*Cucurbita moschata*) visando a  
730 biofortificacao em carotenoides. D. Sc. Thesis, Universidade Federal de Viçosa. Available  
731 from: <https://www.locus.ufv.br/handle/123456789/1367>.
- 732 Long, W., Hu, M., Gao, J., Chen, S., Zhang, J., Cheng, L., Pu, H., 2018. Identification  
733 and functional analysis of two new mutant BnFAD2 alleles that confer elevated oleic acid  
734 content in rapeseed. *Front. Genet.* 9, 1-12. [https://doi: 10.3389/fgene.2018.00399](https://doi.org/10.3389/fgene.2018.00399).
- 735 Liu, H.-R., White, P. J., 1992. Oxidative stability of soybean oils with altered fatty acid.  
736 *J. Am. Oil Chem. Soc.* 69, 528–532.
- 737 Moura, M. C. C. L., 2003. Identificação de fontes de resistência ao *potyvirus ZYMV* e  
738 diversidade genética e ecogeográfica em acessos de abóbora. D. Sc. Thesis. Universidade  
739 Federal de Viçosa. Available from: <https://www.locus.ufv.br/handle/123456789/10265>.
- 740 Nagar, A., Sureja, A. K., Kar, A., Bhardwaj, R., Krishnan, S. G., Munshi, A. Das. 2018.  
741 Profiling of mineral nutrients and variability study in pumpkin (*Cucurbita moschata*)  
742 genotypes. *Agr. Res.* 7, 225-231. <https://doi.org/10.1007/s40003-018-0329-3>.
- 743 Oliveira, R. L. O., Gonçalves, L. S. A., Rodrigues, R., Baba, V. Y., Sudré, C. P., Santos,  
744 M. H., Aranha, F. M. 2016. Genetic divergence among pumpkin landraces. *Semin-Cienc Agrar.*  
745 37, 1-10. <https://doi.org/10.5433/1679-0359.2016v37n2p547>.
- 746 Oliveira, R. L., Gomes, R. S., Almeida, C. F., Machado Júnior, R., Rocha, J. R. A. S.  
747 C., Silva, D. J. H., Carneiro, P. C. S. 2020. Multitrait selection of pumpkin genotypes aimed at  
748 reducing the growth habit and improving seed production. *Crop Sci.* 61, 1-10. [https://doi: 10.1002/csc2.20386](https://doi.org/10.1002/csc2.20386).
- 749 Ohlrogge, J., Browse, J., 1995. Lipid biosynthesis. *Plant Cell.* 7, 957–970.  
750 <https://doi.org/10.2307/3870050>.
- 751 Patel, S., 2013. Pumpkin (*Cucurbita* sp.) seeds as nutraceutical: A review on status quo  
752 and scopes. *Mediterr. J. Nutr. Metab.* 6, 183-189. <https://doi.org/10.1007/s12349-013-0131-5>.
- 753 Piperno, D. R., Stothert, K. E., 2003. Phytolith evidence for early Holocene *Cucurbita*  
754 domestication in Southwest Ecuador. *Science.* 299, 1054-1057. [https://doi: 10.1126/science.1080365](https://doi.org/10.1126/science.1080365).
- 755 Priori, D., Valduga, E., Villela, J. C. B., Mistura, C. C., Vizzotto, M., Valgas, R.,  
756 Barbieri, R. L., 2017. Characterization of bioactive compounds, antioxidant activity and  
757 minerals in landraces of pumpkin (*Cucurbita moschata*) cultivated in Southern Brazil. *Food*  
758 *Sci. Tech-Brazil.* 37, 33-40. <https://doi.org/10.1590/1678-457x.05016>.
- 759 Resende, M. D.V., 1995. Delineamento de experimentos de seleção para maximização  
760 da acurácia seletiva e do progresso genético. *Rev. Arvore.* 19, 479–500.
- 761 Saltzman, A., Birol, E., Bouis, H. E., Boy, E., De Moura, F. F., Islam, Y., Pfeiffer, W.  
762 H., 2013. Biofortification: progress toward a more nourishing future. *Glob. Food Secur.* 2, 9-  
763 17. <https://doi.org/10.1016/j.gfs.2012.12.003>.



- 766 Shimakura, S.E., Ribeiro Júnior, P. J. 2012. Estatística descritiva: interpretação do  
767 coeficiente de correlação. Universidade Federal do Paraná, Curitiba.
- 768 Silva, D. J. H, Moura, M. C. C., Casali, V. W. D., 2001. Recursos genéticos do banco  
769 de germoplasma de hortaliças da UFV: histórico e expedições de coleta. Hortic. Bras. 19, 108-  
770 114. <https://doi.org/10.1590/S0102-05362001000200002>.
- 771 Sobreira, F. M., 2013. Divergência genética entre acessos de abóbora para  
772 estabelecimento de coleção nuclear e pré-melhoramento para óleo funcional. D. Sc. Thesis,  
773 Universidade Federal de Viçosa. Available from:  
774 <https://www.locus.ufv.br/handle/123456789/1367>.
- 775 Song, W., Yang, R., Wu, T., Wu, C., Sun, S., Zhang, S., Jiang, B., Tian, S., Liu, X.,  
776 Han, T., 2016. Analyzing the effects of climate factors on soybean protein, oil contents, and  
777 composition by extensive and high-density sampling in China. J. Agric. Food Chem. 64, 4121–  
778 4130. <https://doi: 10.1021/acs.jafc.6b00008>.
- 779 Thiex, N. J., Anderson, S., Gildemeister, B., 2003. Crude fat, hexanes extraction, in  
780 feed, cereal grain, and forage (Randall/Soxtec/Submersion Method): Collaborative study.  
781 Journal of AOAC International, 86, 899-908.
- 782 Veronezi, C. M., Jorge, N., 2015. Chemical characterization of the lipid fractions of  
783 pumpkin seeds. Nutr. Food Sci. 45, 164-173. <https://doi 10.1108/NFS-01-2014-0003>.
- 784 Veronezi, C., Jorge, N., 2012. Bioactive compounds in lipid fractions of pumpkin  
785 (*Cucurbita* sp) seeds for use in food. J. Food Sci. 77, 53-57. <http://doi: 10.1111/j.1750-3841.2012.02736.x>.
- 787 Wang, H., Wu, B., Song, T., Chen, S., 2009. Effects of long-term selection for  
788 kernel oil concentration in KYHO, a high-oil maize population. Crop Sci. 49, 459–466.  
789 <https://doi: 10.2135/cropsci2008.06.0336>.
- 790 Werteker, M., Lorenz, A., Johannes, H., Berghofer, E., Findlay, C. S., 2010.  
791 Environmental and varietal influences on the fatty acid composition of rapeseed, soybeans and  
792 sunflowers. J. Agron. Crop Sci. 196, 20-27. <https://doi:10.1111/j.1439-037X.2009.00393.x>.
- 793 Wu, J. H. Y., Micha, R., Mozaffarian, D., 2019. Dietary fats and cardiometabolic  
794 disease: mechanisms and effects on risk factors and outcomes. 16, 1-21.  
795 <https://doi.org/10.1038/s41569-019-0206-1>.
- 796 Wu, T., Yang, X., Sun, S., Wang, C., Wang, Y., Jia, H., Man, W., Fu, L., Song, W.,  
797 Wu, C., Yan, H., Jiang, B., Hou, W., Ren, G., Han, T., 2017. Temporal–spatial characterization  
798 of seed proteins and oil in widely grown soybean cultivars across a century of breeding in  
799 China. Crop. Sci. 57, 748–759. <https://doi: 10.2135/cropsci2016.05.0336>.
- 800 Xie, Y., Jiang, S., Li, M., Guo, Y., Cheng, Y., Qian, H., Yao, W., 2019. Evaluation on  
801 the formation of lipid free radicals in the oxidation process of peanut oil. LWT-Food Sci.  
802 Technol. 104, 24–29. <https://doi: 10.1016/j.lwt.2019.01.016>.
- 803 Yol, E., Ustun, R., Golukcu, M., Uzun, B., 2017. Oil content, oil yield and fatty acid  
804 profile of groundnut germplasm in Mediterranean climates. J. Am. Oil Chem. Soc.94, 787–  
805 804. <https://doi 10.1007/s11746-017-2981-3>.
- 806 Yanishlieva, N. V., Marinova, E. M., 2001. Stabilisation of edible oils with natural  
807 antioxidants. Eur. J. Lipid Sci. Tech. 103, 752–767. [https://doi: 10.1002/\(ISSN\)1438-9312](https://doi: 10.1002/(ISSN)1438-9312).
- 808  
809  
810  
811  
812  
813  
814  
815
